# Supplementary material for: Does a Plant-Based Diet Stand Out for Its Favorable Composition for Heart Health? Dietary Intake Data from a Randomized Controlled Trial
Source: MDPI journal article supplement (doi:10.3390/nu14214597), 2022-11-01
Supplement: s1 [file s1]

## Supplementary Materials

### Does a plant-based diet stand out for its favorable composition for heart health? Dietary intake data from a randomized-controlled trial

**Table S1.** D-A-CH reference values: Gender- and age-specific DRI for a PAL of 1.6

| Nutrient                        | Unit | Women<br>age<br>25-51 | Women<br>age<br>51-65 | Women<br>age<br>65< | Men<br>age<br>25-51 | Men<br>age<br>51-65 | Men<br>age<br>65< |
|---------------------------------|------|-----------------------|-----------------------|---------------------|---------------------|---------------------|-------------------|
| <b>Macronutrients</b>           |      |                       |                       |                     |                     |                     |                   |
| Total Energy                    | kcal | 2100                  | 2000                  | 1900                | 2700                | 2500                | 2500              |
| Total carbohydrates             | g    | 287.5                 | 273                   | 260.1               | 369.6               | 342.3               | 342.3             |
| Total dietary fiber             | g    | 30                    | 30                    | 30                  | 30                  | 30                  | 30                |
| Total Protein                   | g    | 62.5                  | 59.5                  | 56.5                | 80.4                | 74.4                | 74.4              |
| Total Fat                       | g    | 67.7                  | 64.5                  | 61.3                | 87.1                | 80.6                | 80.6              |
| SFA                             | g    | 22.6                  | 21.5                  | 20.4                | 29                  | 26.9                | 26.9              |
| MUFA                            | g    | 22.6                  | 21.5                  | 20.4                | 29                  | 26.9                | 26.9              |
| PUFA                            | g    | 22.6                  | 21.5                  | 20.4                | 29                  | 26.9                | 26.9              |
| Linoleic Acid                   | g    | 5.6                   | 5.7                   | 5.1                 | 7.3                 | 6.7                 | 6.7               |
| Alpha-Linoleic Acid             | g    | 1.1                   | 1.1                   | 1                   | 1.5                 | 1.3                 | 1.3               |
| Cholesterol                     | mg   | 300                   | 300                   | 300                 | 300                 | 300                 | 300               |
| Salt                            | g    | 5                     | 5                     | 5                   | 5                   | 5                   | 5                 |
| <b>Vitamins</b>                 |      |                       |                       |                     |                     |                     |                   |
| Retinol equivalent              | µg   | 800                   | 800                   | 800                 | 1000                | 1000                | 1000              |
| Vitamine B1                     | mg   | 1                     | 1                     | 1                   | 1.2                 | 1.2                 | 1.1               |
| Vitamine B2                     | mg   | 1.1                   | 1                     | 1                   | 1.4                 | 1.3                 | 1.3               |
| Vitamine B3 (Niacin equivalent) | µg   | 12000                 | 11000                 | 11000               | 15000               | 15000               | 14000             |
| Vitamine B5 (Pantothenic acid)  | mg   | 6                     | 6                     | 6                   | 6                   | 6                   | 6                 |
| Vitamine B6                     | mg   | 1.2                   | 1.2                   | 1.2                 | 1.5                 | 1.5                 | 1.4               |
| Vitamine B7 Biotin              | µg   | 45                    | 45                    | 45                  | 45                  | 45                  | 45                |
| Vitamine B9 Folate              | µg   | 300                   | 300                   | 300                 | 300                 | 300                 | 300               |
| Vitamine B12                    | µg   | 3                     | 3                     | 3                   | 3                   | 3                   | 3                 |
| Vitamine C                      | mg   | 95                    | 95                    | 95                  | 110                 | 110                 | 110               |
| Vitamine D                      | µg   | 20                    | 20                    | 20                  | 20                  | 20                  | 20                |
| Vitamine E.                     | mg   | 12                    | 12                    | 11                  | 14                  | 13                  | 12                |
| Vitamine K                      | µg   | 60                    | 65                    | 65                  | 70                  | 80                  | 80                |
| <b>Minerals</b>                 |      |                       |                       |                     |                     |                     |                   |
| Sodium                          | mg   | 2000                  | 2000                  | 2000                | 2000                | 2000                | 2000              |
| Chloride                        | mg   | 3000                  | 3000                  | 3000                | 3000                | 3000                | 3000              |
| Potassium                       | mg   | 2000                  | 2000                  | 2000                | 2000                | 2000                | 2000              |
| Magnesium                       | mg   | 300                   | 300                   | 300                 | 350                 | 350                 | 350               |
| Zinc                            | mg   | 7                     | 7                     | 7                   | 10                  | 10                  | 10                |
| Copper                          | µg   | 1250                  | 1250                  | 1250                | 1250                | 1250                | 1250              |
| Phosphorus                      | mg   | 700                   | 700                   | 700                 | 700                 | 700                 | 700               |
| Fluoride                        | µg   | 3100                  | 3100                  | 3100                | 3800                | 3800                | 3800              |
| Calcium                         | mg   | 1000                  | 1000                  | 1000                | 1000                | 1000                | 1000              |
| Iron                            | mg   | 15                    | 10                    | 10                  | 10                  | 10                  | 10                |
| Iodine                          | µg   | 200                   | 180                   | 180                 | 200                 | 180                 | 180               |
| Mangangese                      | µg   | 3500                  | 3500                  | 3500                | 3500                | 3500                | 3500              |

**Table S2.** Absolute and relative daily nutrient intake before and after the intervention and comparison between the groups

|                                     | Plant-Based (n=18)  |                       |                 |               |                  |                      | Control (n=19)  |               |                 |               |                |                      | Treatment effect |        |
|-------------------------------------|---------------------|-----------------------|-----------------|---------------|------------------|----------------------|-----------------|---------------|-----------------|---------------|----------------|----------------------|------------------|--------|
|                                     | Baseline            |                       | Week 8          |               | Δ                |                      | Baseline        |               | Week 8          |               | Δ              |                      |                  |        |
|                                     | Intake <sup>a</sup> | % of DRI <sup>c</sup> | Intake          | % of DRI      | Intake           | P-value <sup>a</sup> | Intake          | % of DRI      | Intake          | % of DRI      | Intake         | p-value <sup>a</sup> |                  |        |
| Macronutrients                      |                     |                       |                 |               |                  |                      |                 |               |                 |               |                |                      |                  |        |
| Energy [kcal]                       | 2392.2 ± 382.6      | 111 [101;121]         | 1798.1 ± 315.1  | 84 [78;90]    | -594.1 ± 374.9   | <0.001               | 1955.4 ± 452.0  | 95 [85;106]   | 1955.1 ± 477.1  | 101 [88;113]  | -0.3 ± 357.0   | 0.777                | 0.66             | <0.001 |
| Total carbohydrates [g]             | 217.2 ± 58.9        | 74 [65;82]            | 189.7 ± 41.6    | 69 [62;75]    | -27.5 ± 42.4     | 0.043                | 178.8 ± 52.7    | 64 [54;73]    | 187.9 ± 47.2    | 74 [60;89]    | 9.2 ± 58.9     | 0.616                | 0.29             | 0.078  |
| Total dietary fiber [g]             | 24.2 ± 8.7          | 98 [84;111]           | 31.3 ± 8.6      | 114 [98;130]  | 7.1 ± 6.5        | <0.001               | 24.9 ± 8.3      | 81 [68;94]    | 24.5 ± 8.1      | 91 [74;108]   | -0.4 ± 8.0     | 0.777                | 0.50             | 0.002  |
| Insoluble fiber [g]                 | 15.9 ± 5.9          | ---                   | 20.2 ± 5.2      | ---           | 4.4 ± 4.7        | 0.003                | 15.9 ± 4.8      | ---           | 15.2 ± 5.2      | ---           | -0.6 ± 4.2     | 0.557                | 0.48             | 0.003  |
| Soluble fiber [g]                   | 7.1 ± 2.3           | ---                   | 9.2 ± 2.9       | ---           | 2.1 ± 2.3        | 0.001                | 7.5 ± 2.1       | ---           | 7.6 ± 2.7       | ---           | 0.1 ± 2.8      | 0.679                | 0.39             | 0.016  |
| Total protein [g]                   | 90.3 ± 15.0         | 121 [108;134]         | 56.2 ± 10.1     | 89 [80;98]    | -34.1 ± 13.3     | <0.001               | 74.4 ± 15.5     | 123 [110;136] | 75.8 ± 18.4     | 123 [110;136] | 1.4 ± 17.4     | 0.679                | 0.78             | <0.001 |
| Essential AA [g]                    | 43.9 ± 7.9          | ---                   | 24.9 ± 5.9      | ---           | -19.0 ± 6.6      | <0.001               | 36.0 ± 8.1      | ---           | 36.1 ± 9.2      | ---           | 0.1 ± 8.5      | 0.983                | 0.80             | <0.001 |
| Non-essential AA [g]                | 44.2 ± 7.9          | ---                   | 28.4 ± 6.0      | ---           | -15.8 ± 6.3      | <0.001               | 36.2 ± 7.3      | ---           | 36.5 ± 8.6      | ---           | 0.35 ± 8.1     | 0.948                | 0.78             | <0.001 |
| Total Fat [g]                       | 112.6 ± 22.3        | 144±41 [125;163]      | 78.1 ± 18.3     | 110 [98;122]  | -34.5 ± 31.0     | 0.001                | 91.3 ± 29.5     | 138 [119;158] | 87.5 ± 30.8     | 135 [114;157] | -3.8 ± 26.9    | 0.286                | 0.46             | 0.005  |
| SFA [g]                             | 45.3 ± 12.7         | 149 [121;178]         | 21.3 ± 9.0      | 84 [70;98]    | -24.1 ± 14.3     | 0.001                | 35.6 ± 12.8     | 162 [136;187] | 34.7 ± 14.7     | 161 [130;191] | -0.9 ± 9.7     | 0.446                | 0.72             | <0.001 |
| MUFA [g]                            | 41.1 ± 9.1          | 157 [134;180]         | 28.3 ± 8.2      | 123 [105;141] | -12.8 ± 12.4     | 0.003                | 31.2 ± 10.5     | 143 [122;164] | 29.5 ± 10.6     | 136 [113;158] | -1.8 ± 9.8     | 0.267                | 0.55             | 0.001  |
| PUFA [g]                            | 18.3 ± 5.3          | 101 [88;113]          | 23.7 ± 8.4      | 107 [92;122]  | 5.4 ± 11.5       | 0.078                | 18.4 ± 12.1     | 83 [58;108]   | 17.6 ± 8.4      | 85 [66;103]   | -0.7 ± 13.5    | 0.983                | 0.25             | 0.129  |
| LA [g]                              | 14.4 ± 5.2          | 290 [246;333]         | 19.1 ± 7.4      | 300 [244;357] | 4.7 ± 10.3       | 0.071                | 14.0 ± 9.4      | 253 [177;330] | 14.1 ± 7.6      | 250 [181;318] | 0.2 ± 11.7     | 0.711                | 0.21             | 0.191  |
| ALA [g]                             | 2.5 ± 1.8           | 351 [280;421]         | 4.1 ± 3.3       | 375 [231;519] | 1.6 ± 2.6        | 0.028                | 3.2 ± 3.8       | 293 [133;453] | 2.3 ± 2.1       | 224 [139;309] | -1.0 ± 2.6     | 0.151                | 0.41             | 0.013  |
| Cholesterol [mg]                    | 383.7 ± 133.1       | 79 [58;99]            | 76.7 ± 58.8     | 24 [16;33]    | -307.0 ± 144.8   | <0.001               | 301.9 ± 142.6   | 99 [78;120]   | 294.7 ± 163.8   | 96 [72;120]   | -7.2 ± 160.2   | 0.586                | 0.74             | <0.001 |
| Salt [g]                            | 6.5 ± 2.0           | 102 [84;120]          | 3.7 ± 2.1       | 75 [56;94]    | -2.8 ± 2.8       | 0.003                | 4.3 ± 2.0       | 83 [64;102]   | 5.0 ± 1.8       | 110 [79;142]  | 0.7 ± 2.0      | 0.286                | 0.60             | <0.001 |
| Vitamins                            |                     |                       |                 |               |                  |                      |                 |               |                 |               |                |                      |                  |        |
| Retinol equivalent [μg]             | 1660.6 ± 865.3      | 169 [119;219]         | 1230.4 ± 771.3  | 140 [95;184]  | -430.1 ± 1275.4  | 0.184                | 1575.9 ± 8401   | 173 [141;206] | 1578.3 ± 632.6  | 193 [155;230] | 2.4 ± 1034.3   | 0.845                | 0.21             | 0.202  |
| Vitamine B1 [mg]                    | 1.4 ± 0.3           | 133 [118;148]         | 1.4 ± 0.4       | 128 [110;145] | -0.1 ± 0.5       | 0.632                | 1.2 ± 0.3       | 111 [98;125]  | 1.3 ± 0.4       | 130 [110;150] | 0.1 ± 0.3      | 0.107                | 0.24             | 0.136  |
| Vitamine B2 [mg]                    | 1.7 ± 0.4           | 136 [119;154]         | 1.1 ± 0.3       | 106 [92;121]  | -0.5 ± 0.4       | <0.001               | 1.4 ± 0.4       | 127 [108;147] | 1.5 ± 0.5       | 151 [126;175] | 0.1 ± 0.4      | 0.157                | 0.19             | 0.242  |
| Vitamine B3, Niacin equivalent [mg] | 38.3 ± 8.1          | 268 [229;307]         | 24.7 ± 5.5      | 195 [166;224] | -13.6 ± 7.3      | <0.001               | 31.1 ± 7.8      | 269 [235;304] | 30.1 ± 8.2      | 258 [224;292] | -1.0 ± 7.6     | 0.528                | 0.67             | <0.001 |
| Vitamine B5 [mg]                    | 5.0 ± 1.2           | 80 [71;90]            | 4.0 ± 1.6       | 69 [56;81]    | -1.1 ± 1.6       | 0.012                | 4.5 ± 1.2       | 71 [62;81]    | 4.7 ± 1.7       | 85 [67;103]   | 0.1 ± 1.8      | 0.711                | 0.30             | 0.068  |
| Vitamine B6 [mg]                    | 1.8 ± 0.4           | 132 [117;146]         | 1.5 ± 0.4       | 117 [102;132] | -0.3 ± 0.4       | 0.016                | 1.6 ± 0.3       | 127 [113;141] | 1.6 ± 0.4       | 131 [116;145] | 0.0 ± 0.3      | 0.913                | 0.46             | 0.005  |
| Vitamine B7, Biotin [μg]            | 52.3 ± 16.3         | 118 [102;135]         | 48.5 ± 14.8     | 109 [93;125]  | -3.9 ± 20.7      | 0.586                | 46.3 ± 11.7     | 97 [84;110]   | 49.5 ± 15.2     | 116 [98;134]  | 3.2 ± 15.6     | 0.349                | 0.17             | 0.288  |
| Vitamine B9, Folate [μg]            | 350.9 ± 109.1       | 115 [98;131]          | 310.9 ± 70.6    | 109 [99;118]  | -40.1 ± 97.5     | 0.184                | 291.6 ± 94.3    | 94 [79;109]   | 292.1 ± 75.9    | 103 [88;118]  | 0.5 ± 82.1     | 0.616                | 0.19             | 0.236  |
| Vitamine B12 [μg]                   | 5.7 ± 2.4           | 112 [75;148]          | 1.0 ± 1.2       | 28 [11;45]    | -4.6 ± 2.9       | <0.001               | 3.9 ± 1.7       | 130 [105;155] | 4.0 ± 2.0       | 129 [99;159]  | 0.1 ± 2.3      | 0.983                | 0.73             | <0.001 |
| Vitamine C [mg]                     | 125.5 ± 54.3        | 144 [120;167]         | 144.1 ± 84.6    | 160 [121;200] | 18.6 ± 101.3     | 0.42                 | 157.1 ± 80.1    | 175 [135;214] | 126.4 ± 47.3    | 127 [104;150] | -30.7 ± 72.1   | 0.043                | 0.25             | 0.121  |
| Vitamine D [μg]                     | 3.8 ± 3.2           | 17 [10;24]            | 1.7 ± 1.5       | 15 [2;29]     | -2.1 ± 3.7       | 0.031                | 3.9 ± 6.3       | 12 [8;15]     | 2.7 ± 1.5       | 28 [-1;58]    | -1.2 ± 6.2     | 0.983                | 0.24             | 0.136  |
| Vitamine E [mg]                     | 16.8 ± 6.0          | 155 [134;177]         | 19.8 ± 5.4      | 163 [141;184] | 3.0 ± 8.0        | 0.184                | 16.1 ± 7.7      | 142 [111;172] | 18.0 ± 8.0      | 152 [119;185] | 1.9 ± 11.0     | 0.5                  | 0.09             | 0.574  |
| Vitamine K [μg]                     | 195.6 ± 193.3       | 254 [143;366]         | 152.2 ± 131.3   | 214 [117;310] | -43.4 ± 227.0    | 0.557                | 161.4 ± 108.5   | 246 [172;320] | 190.2 ± 152.7   | 269 [162;376] | 28.8 ± 114.7   | 0.446                | 0.16             | 0.316  |
| Minerals                            |                     |                       |                 |               |                  |                      |                 |               |                 |               |                |                      |                  |        |
| Sodium [mg]                         | 2753.5 ± 822.2      | 109 [90;128]          | 1620.7 ± 870.7  | 81 [60;101]   | -1132.8 ± 1202.1 | 0.004                | 1861.1 ± 863.5  | 90 [69;110]   | 2147.6 ± 820.4  | 119 [88;149]  | 286.5 ± 800.2  | 0.286                | 0.61             | <0.001 |
| Chloride [mg]                       | 4170.7 ± 1222.8     | 113 [94;132]          | 2563.5 ± 1298.8 | 86 [66;106]   | -1607.3 ± 1754.9 | 0.003                | 2814.6 ± 1189.6 | 91 [72;110]   | 3291.0 ± 1150.5 | 117 [93;141]  | 476.4 ± 1387.2 | 0.231                | 0.58             | <0.001 |
| Potassium [mg]                      | 3402.8 ± 651.3      | 160 [145;175]         | 2970.9 ± 655.5  | 144 [126;162] | -431.9 ± 670.2   | 0.02                 | 3001.4 ± 627.3  | 144 [126;161] | 3046.4 ± 581.7  | 149 [134;164] | 45.1 ± 513.7   | 0.616                | 0.38             | 0.021  |
| Magnesium [mg]                      | 498.1 ± 401.7       | 145 [83;208]          | 428.3 ± 107.4   | 131 [111;152] | -69.9 ± 408.8    | 0.557                | 348.4 ± 117.6   | 110 [91;129]  | 362.4 ± 99.6    | 127 [108;145] | 14.1 ± 94.8    | 0.349                | 0.06             | 0.715  |
| Zinc [mg]                           | 11.9 ± 2.6          | 137 [114;160]         | 8.9 ± 2.2       | 117 [102;131] | -2.9 ± 3.1       | 0.002                | 9.6 ± 2.5       | 132 [116;148] | 10.6 ± 3.6      | 143 [123;164] | 1.0 ± 3.3      | 0.215                | 0.55             | 0.001  |
| Copper [μg]                         | 2260.1 ± 720.2      | 181 [154;207]         | 2372.7 ± 603.8  | 180 [152;208] | 112.6 ± 734.7    | 0.231                | 1896.4 ± 658.7  | 146 [119;173] | 1931.5 ± 613.2  | 163 [136;189] | 35.1 ± 598.2   | 0.679                | 0.05             | 0.738  |
| Sulfur [mg]                         | 971.0 ± 243.1       | ---                   | 566.6 ± 131.5   | ---           | -404.4 ± 238.8   | <0.001               | 781.6 ± 191.6   | ---           | 790.5 ± 193.5   | ---           | 8.9 ± 194.2    | 0.811                | 0.75             | <0.001 |
| Phosphorus [mg]                     | 1453.4 ± 258.4      | 187 [170;204]         | 1127.2 ± 303.5  | 156 [133;179] | -326.2 ± 210.5   | <0.001               | 1210.0 ± 246.9  | 165 [146;185] | 1289.6 ± 331.4  | 187 [166;209] | 79.6 ± 311.2   | 0.215                | 0.64             | <0.001 |
| Fluoride [μg]                       | 2004.3 ± 4179.9     | 45 [-17;108]          | 953.0 ± 501.6   | 31 [22;41]    | -1051.3 ± 4202.8 | 0.396                | 789.0 ± 377.2   | 24 [18;30]    | 872.4 ± 435.6   | 58 [-1;116]   | 83.5 ± 351.9   | 0.133                | 0.24             | 0.136  |
| Calcium [μg]                        | 1174.5 ± 1412.9     | 89 [24;154]           | 551.4 ± 188.7   | 56 [44;68]    | -623.1 ± 1419.1  | <0.001               | 708.4 ± 203.7   | 67 [56;78]    | 849.8 ± 260.5   | 101 [68;135]  | 141.4 ± 316.6  | 0.071                | 0.68             | <0.001 |
| Iron [mg]                           | 14.3 ± 3.8          | 138 [119;157]         | 13.8 ± 3.7      | 132 [113;151] | -0.5 ± 4.0       | 0.948                | 13.5 ± 4.0      | 124 [103;144] | 13.6 ± 4.1      | 141 [118;163] | 0.1 ± 3.9      | 0.777                | 0.06             | 0.727  |
| Iodine [μg]                         | 121.9 ± 77.2        | 51 [31;71]            | 54.7 ± 25.5     | 32 [23;40]    | -67.2 ± 81.4     | <0.001               | 91.9 ± 55.1     | 43 [34;52]    | 92.3 ± 28.0     | 66 [33;100]   | 0.4 ± 62.7     | 0.327                | 0.66             | <0.001 |
| Manganese [μg]                      | 5402.7 ± 2411.8     | 194 [162;226]         | 8038.3 ± 3563.5 | 243 [200;287] | 2635.7 ± 2617.2  | 0.001                | 5630.7 ± 2979.4 | 155 [114;196] | 6324.4 ± 3642.3 | 218 [142;293] | 693.7 ± 2123.9 | 0.199                | 0.38             | 0.019  |

Data results from three-day weighed food records analyzed with NutriGuide software, including the German Nutrient Data Base (German: Bundeslebensmittelschlüssel)

<sup>a</sup> Nutrient intake is presented as mean ± SD and compared within the groups with the Wilcoxon signed rank test for paired samples.

<sup>b</sup> Treatment effect and p-value between groups was determined using the Mann-Withney-U test, comparing the delta of the nutrient intake (= intake at baseline vs. intake after 8 weeks).

<sup>c</sup> The adequate nutrient supply is depicted as mean [95% confidence interval]. It was calculated as a percentage of the daily recommended intake (DRI) and adjusted to gender and age and under the assumption of moderate movement (Physical Activity Level, PAL 1,6). D-A-CH Reference values are defined by the German (D), Austrian (A) and Swiss (CH) nutrition societies.
